# Supplementary material
Source: MDPI journal article supplement (https://www.mdpi.com/2227-9717/9/12/2137)
Supplement: s1 [file s1]

Supplementary Materials:

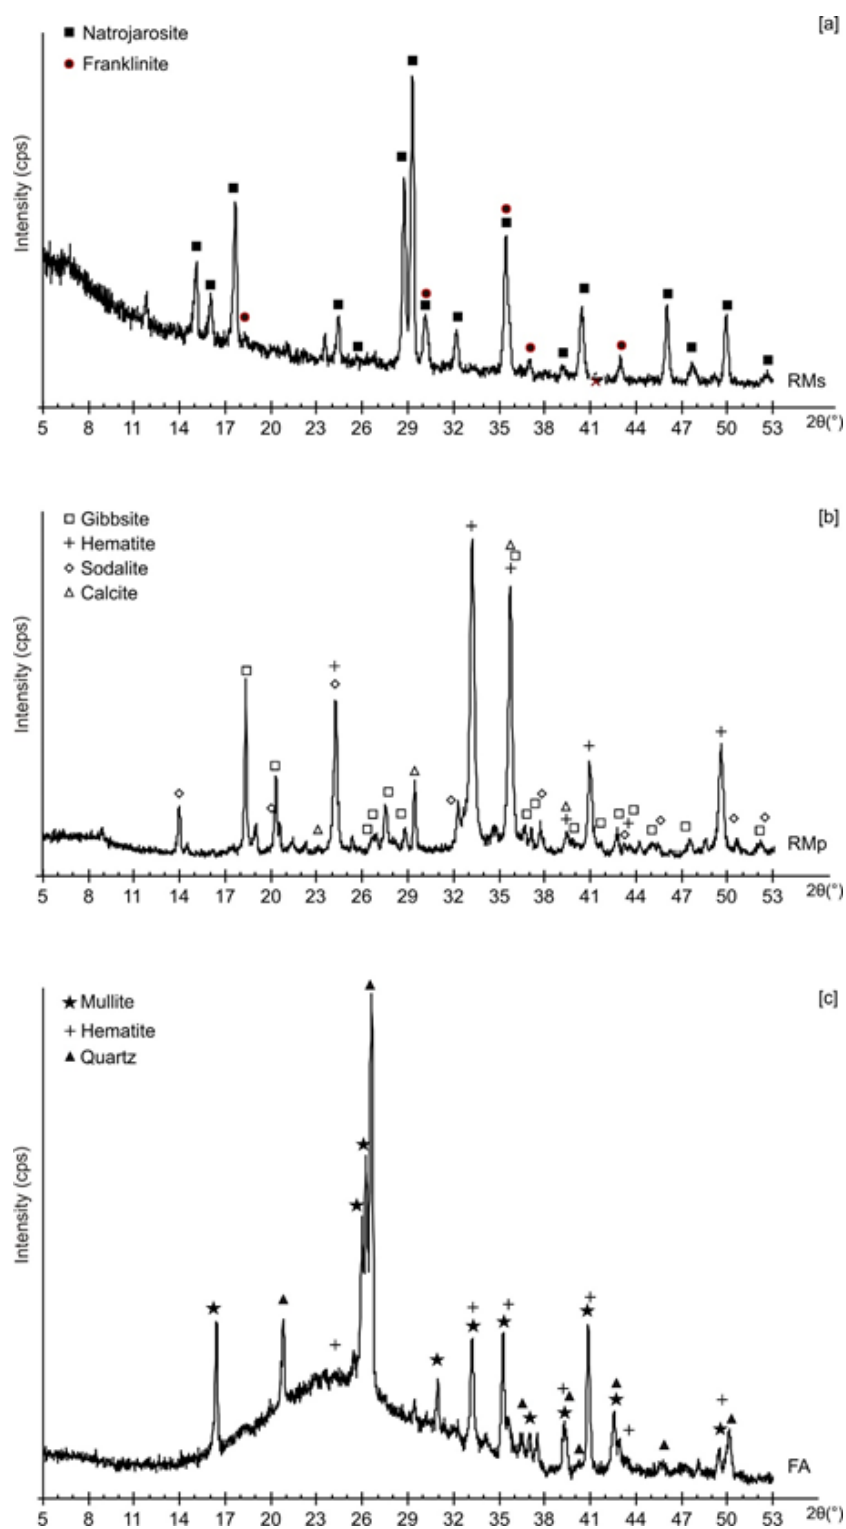

Figure S1. XRD patterns of: (a) RMs; (b) RMp and (c) FA.

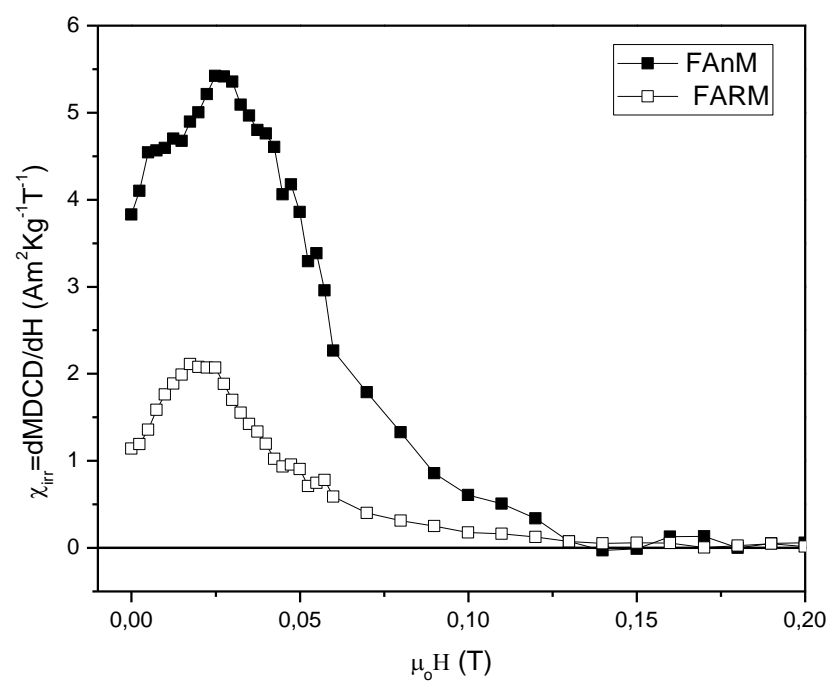

**Figure S2.** Irreversible magnetic susceptibility for FAnM and FARMp samples.

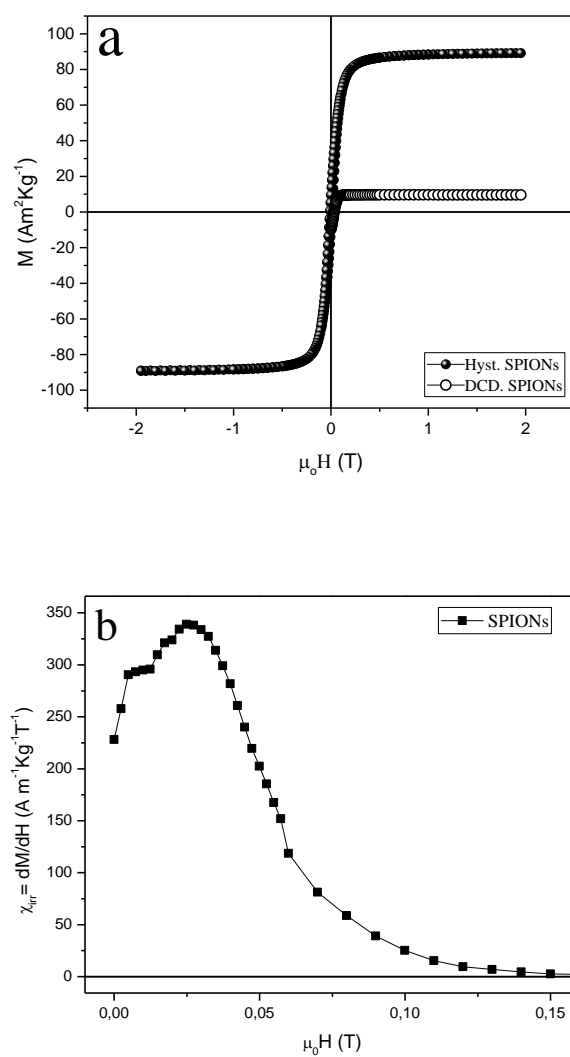

**Figure S3.** (a) Field dependence of magnetization (full circle) and DCD remanence magnetization (empty circles) recorded at 300 K; (b) irreversible susceptibility extracted from DCD.

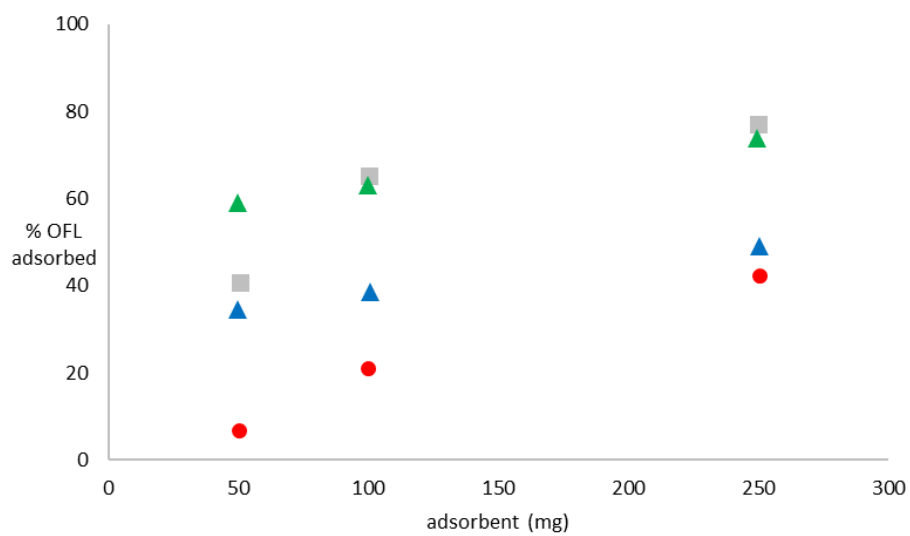

**Figure S4.** % adsorbed OFL *vs.* adsorbent amount (50, 100, 250 mg): SAnM (▲), SARMs (●), FAnM (▲), and FARMp (■) (Experimental conditions: 10 mL tap water, OFL concentration 10 L<sup>-1</sup>).

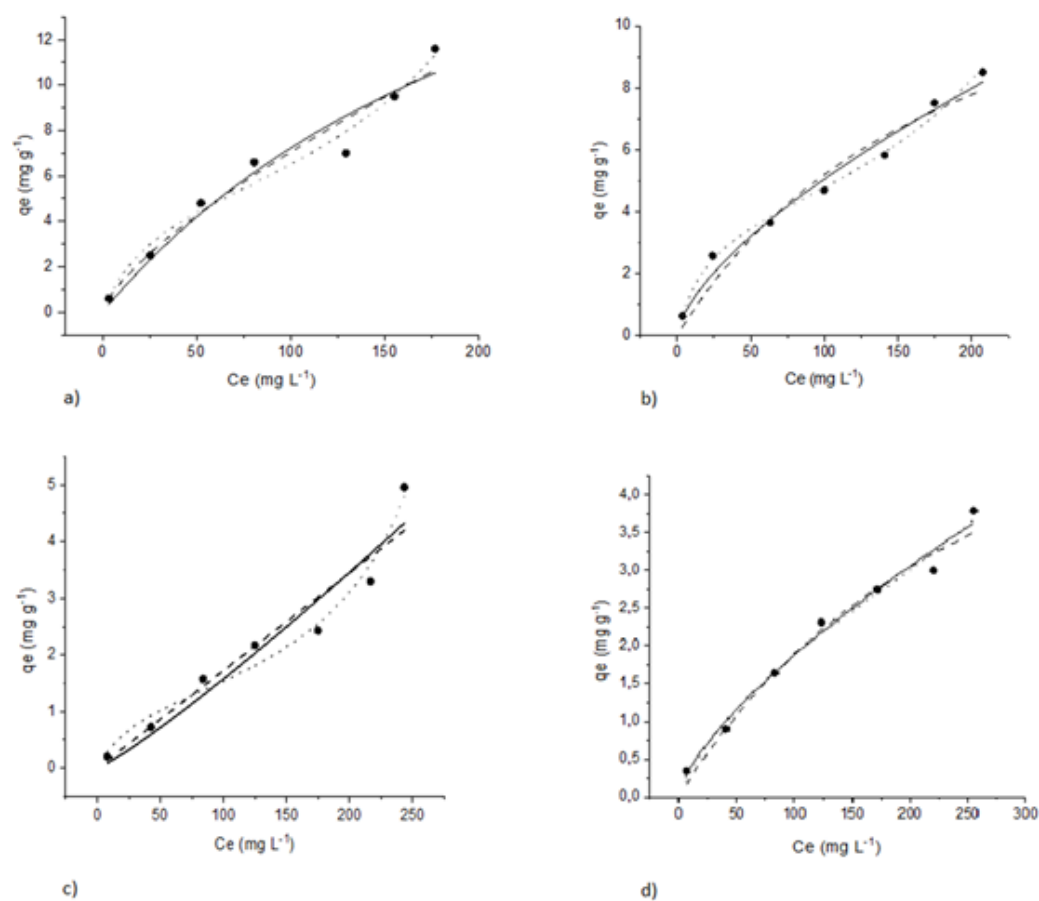

**Figure S5.** Adsorption profiles Langmuir (---), Freundlich (—) and BET (...) for OFL on (a) FARMp, (b) FanM, (c) SARMs and (d) SAnM, (Experimental conditions: 100 mg, 10 mL tap water, OFL solution from 10 to 293 mg L<sup>-1</sup>).

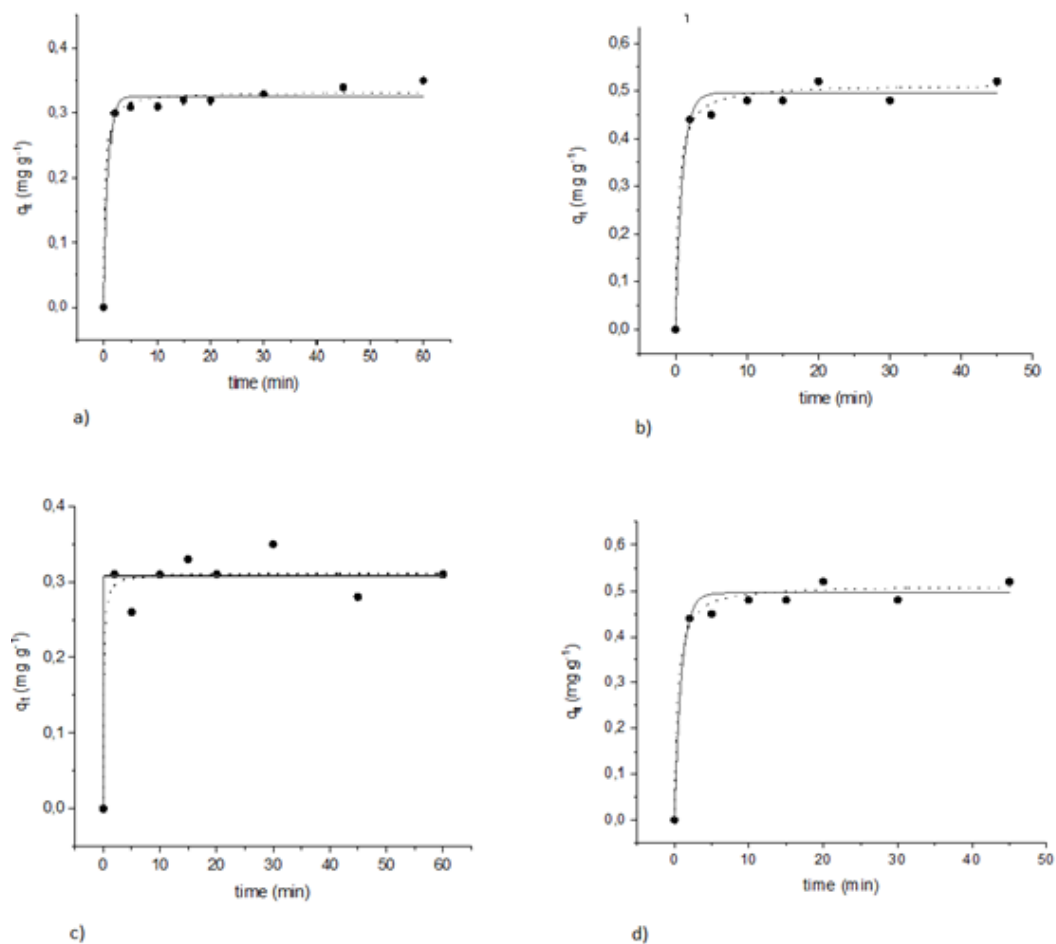

**Figure S6.** Kinetic profiles (pseudo-first order (—) and pseudo-second (---) order) for OFL on (a) FARMp, (b) FAnM, (c) SARMs and (d) SAnM (Experimental conditions: 200 mg, 20 mL tap water, OFL initial concentration 20 mg L<sup>-1</sup>).

**Table S1.** Sample synthesis

| Code  | Synthesis                                      |
|-------|------------------------------------------------|
| SAnM  | Pure silica and alumina source + SPIONs        |
| SARMs | Pure silica and alumina source + Red Mud (RMs) |
| FAnM  | Fly ash (FA) + SPIONs                          |
| FARMp | Fly ash (FA) + Red mud (RMp)                   |

**Table S2.** XRF chemical composition of red muds (RM) and fly ash (FA) (wt%).

|                                | FA    | RMp   | RMs   |
|--------------------------------|-------|-------|-------|
| Fe <sub>2</sub> O <sub>3</sub> | 5.23  | 36.80 | 37.04 |
| MgO                            | 1.43  | 0.21  | 0.31  |
| Al <sub>2</sub> O <sub>3</sub> | 28.21 | 11.46 | 0.89  |
| SiO <sub>2</sub>               | 46.80 | 7.89  | 4.23  |
| CaO                            | 5.57  | 3.53  | 1.09  |

**Table S3.** Isotherm parameters obtained by fitting the experimental data for OFL adsorption onto SAnM, SARMs, FAnM, and FARMp. (Experimental conditions: 100 mg adsorbent phase, 10 mL tap water, OFL concentrations from 10 to 293 mg L<sup>-1</sup>).

|                     |                                                             | <b>FARMp</b>  | <b>FAnM</b>   | <b>SARMs</b>    | <b>SAnM</b>   |
|---------------------|-------------------------------------------------------------|---------------|---------------|-----------------|---------------|
|                     | $q_{exp}$ (mg g <sup>-1</sup> )                             | 11.6          | <b>8.5</b>    | 5.0             | 3.8           |
| Freundlich          | $K_F$ (mg <sup>(1-n)</sup> L <sup>n</sup> g <sup>-1</sup> ) | 0.3 ± 0.1     | 0.2 ± 0.1     | 0.08 ± 0.01     | 0.71 ± 0.02   |
|                     | 1/n                                                         | 0.7 ± 0.1     | 0.66 ± 0.07   | 1.1 ± 0.2       | 0.71 ± 0.06   |
|                     | R <sup>2</sup>                                              | 0.950         | 0.976         | 0.917           | 0.982         |
|                     |                                                             |               |               |                 |               |
| Langmuir            | $K_L$ (L mg <sup>-1</sup> )                                 | 0.004 ± 0.003 | 0.004 ± 0.002 | 3.8 E-7 ± 0.001 | 0.0032 ± 4E-5 |
|                     | $q_m$ (mg g <sup>-1</sup> )                                 | 26 ± 12       | 18 ± 6        | 44395 ± 2       | 7.74 ± 0.06   |
|                     | R <sup>2</sup>                                              | 0.940         | 0.950         | 0.911           | 0.994         |
| BET                 | $K_s$ (L mg <sup>-1</sup> )                                 | 0.042 ± 0.003 | 0.05 ± 0.03   | 0.03 ± 0.03     | 0.013 ± 0.009 |
|                     | $K_L$ (L mg <sup>-1</sup> )                                 | 0.0033 ± 6E-4 | 0.0027 ± 2E-4 | 0.0030 ± 2E-4   | 0.0015 ± 6E-4 |
|                     | $q_m$ (mg g <sup>-1</sup> )                                 | 5 ± 1         | 4.0 ± 0.3     | 1.3 ± 0.3       | 3 ± 1         |
|                     | R <sup>2</sup>                                              | 0.963         | 0.991         | 0.966           | 0.979         |
|                     |                                                             | <b>FARMp</b>  | <b>FAnM</b>   | <b>SARMs</b>    | <b>SAnM</b>   |
|                     | $q_{exp}$ (mg g <sup>-1</sup> )                             | 0.39          | 0.37          | 0.31            | 0.52          |
| Pseudo-first order  | $k_1$ (min <sup>-1</sup> )                                  | 1.2 ± 0.3     | 0.7 ± 0.1     | 90 ± 0          | 1.0 ± 0.2     |
|                     | $q_e$ (mg g <sup>-1</sup> )                                 | 0.33 ± 0.01   | 0.39 ± 0.01   | 0.31 ± 0.01     | 0.49 ± 0.01   |
|                     | R <sup>2</sup>                                              | 0.983         | 0.996         | 0.931           | 0.983         |
| Pseudo-second order | $k_2$ (g mg <sup>-1</sup> min <sup>-1</sup> )               | 11 ± 4        | 3 ± 1         | 30 ± 63         | 6 ± 2         |
|                     | $q_e$ (mg g <sup>-1</sup> )                                 | 0.33 ± 0.01   | 0.41 ± 0.01   | 0.31 ± 0.01     | 0.50 ± 0.01   |
|                     | R <sup>2</sup>                                              | 0.990         | 0.940         | 0.933           | 0.989         |

**Table S4.** Municipal water of Pavia and Ticino River physico-chemical parameters. Conductivity (μS cm<sup>-1</sup>); other parameters (mg L<sup>-1</sup>).

| <b>Parameters/Ions</b>        | <b>Tap water</b> | <b>River water</b> |
|-------------------------------|------------------|--------------------|
| pH                            | 7.7              | 7.2                |
| Conductivity at 20 °C         | 271              | 166                |
| Cl <sup>-</sup>               | 5.0              | 5.2                |
| NO <sub>3</sub> <sup>-</sup>  | 0.6              | 2.3                |
| SO <sub>4</sub> <sup>2-</sup> | 5.0              | 23.2               |
| HCO <sub>3</sub> <sup>-</sup> | 182              | 73.5               |
| Ca <sup>2+</sup>              | 35               | 25                 |
| Mg <sup>2+</sup>              | 10               | 5.7                |
| Na <sup>+</sup>               | 12               | 4.8                |
